# Supplementary material for: Single-shot self-supervised object detection in microscopy
Source: PubMed Central journal article supplement (PMC9722899; doi:10.1038/s41467-022-35004-y), 2022-12-05
Supplement: 41467_2022_35004_MOESM2_ESM.pdf [file 41467_2022_35004_MOESM2_ESM.pdf]

## Description of Additional Supplementary Files

**Supplementary Movie 1:** LodeSTAR successfully detects objects of various shapes, orientations and noise.

**Supplementary Movie 2:** Mouse hematopoietic stem cells are detected by LodeSTAR as they divide. The score map used for detection is also shown.

**Supplementary Movie 3:** Human hepatocarcinoma-derived cells are detected by LodeSTAR. The score map used for detection is also shown.

**Supplementary Movie 4:** Pancreatic stem cells are detected by LodeSTAR as they divide. The score map used for detection is also shown.

**Supplementary Movie 5:** *Noctiluca scintillans* are detected by LodeSTAR. LodeSTAR detects the optically dense area near the ventral groove where the nucleus is located. The score map used for detection is also shown.

**Supplementary Movie 6:** *Noctiluca scintillans* are detected by LodeSTAR. LodeSTAR detects the plankton as a whole. The score map used for detection is also shown.

**Supplementary Movie 7:** Polystyrene particles under flow are detected by LodeSTAR in 3D.

**Supplementary Movie 8:** SH-SY5Y cells with polystyrene particles inside and around the cell. LodeSTAR detects both the polystyrene (orange markers) and intracellular particles (blue markers).
